# Supplementary material for: Two different mechanisms mediate chemotaxis to inorganic phosphate in Pseudomonas aeruginosa
Source: Springer Nature journal article supplement (doi:10.1038/srep28967), 2016-06-29
Supplement: 41598_2016_BFsrep28967_MOESM2_ESM.pdf [file 41598_2016_BFsrep28967_MOESM2_ESM.pdf]

## Supplementary Material

To

**Two different mechanisms mediate chemotaxis to inorganic phosphate in *Pseudomonas aeruginosa***

Miriam Rico-Jiménez, Jose Antonio Reyes-Darias, Álvaro Ortega, Ana Isabel Díez Peña, Bertrand Morel and Tino Krell

## CtpH

MPASPGHRDVLGCLVAACVPVQPGNPSRRSMLQQSLRAQILVLLGGSLAALLLIALACFGSLTGDVR  
AYRELLGGPVRAAQLIDEANLQFRGQVQEWKNVLLRGRQTEAQTKEYWSQFEAQERAVQDILGRLGSV  
AEGELKDRVERLREEHRRRLGTAYRQGRQRFLEAGADPIAGDQAVTGIDRATTAQMOTLRDELHQASD  
LHSSSISAEARRTMLLGSVLIGASLAVALLSLWLVNRNLVVRPVQRLIEHIAQLSHGDFGERIEIRR  
KDELGKLALAANTLRDFLVDIFDRLRRSTRDLDSASGSLNAIASLMAAGTREQFSRTDQVATAMQEM  
SATAQEVARVYAGDAARADEADDSAQRGEDVMEETIRSIGEMRKEIDHTVEVIRQLESDSGRIGKVL  
DVIRGIAEQTNLLALNAAIEAARAGDAGRGFAVVADEVRTLAQRTAESIAEIHQIIDTVQNGAVNAA  
RAIESGQSRSEAGAEQVANAGAMLRQITASVESIRDMMNRQIATAAEEQTAVAAEISRNLTEIASIAS  
SNQEQQVEQTEAASRDLHGLSAQLGDALQRLRA

## CtpL

MRLKQLTNLNTLLLLTVCLALGITLWWSQRAMERPFQLLDQYLELSQRFDEQVARNIRQYLGSGDAV  
RQQAALQALESLAEALPELPPDLARTLAPSLAELREFSAGDLLAAGKLAGDPQGLLLQAERDLTGNL  
EQWSAYLDAAAGQPQAGAYRTPLLLASLHLTRLSLARAKLVE SANPALAGDVERELANLREQAGRIE  
ALPLLGVLDDEQRSASDDFAAMMGLAGDAEAGAGNAEDRGVALRRELASLLQRYPDELRRTRDLIERR  
QQLSADTGARLDAVRQALATLEPQVRGERQRLQGQVRLIQGMIALILLIALAIDSLQRRLARVLGQ  
LVPALSAWADGDFSRPISLRTRTEDLRNLEDNLRLRSFLAELVGAIHRRAEQVAGSSQTLAEVSSG  
LHAGVERQAGDTGQIRDALGDMEAAIQQVAGDASQTADASRSAGQAVEHGQRVIGESLGGLRELVE  
VQNAQSIERLAEESATIGSVLTVIRSI AEQTNLLALNAAIEAARAGDQGRGFVVAEEVRSQAQRT  
AGATEEIQQLIGRLQQAARQSVEAMRSQVEHAERTAEQAGAAEGALDEVVAIIHTIGVMAERIAEGS  
TQQSQAVGEIRSHSERIHALGGENLRLIGHSREQGEQLRQLGGDLRTTVQAFRL

**Fig. S1) Prediction of CtpH and CtpL transmembrane regions (in red) via the dense alignment surface method <sup>1</sup>. The ligand binding domains of CtpH and CtpL (155 and 286 amino acids, respectively) are shaded in yellow.**



```

          10      20      30      40      50      60
CtpL-LBD  TLWWSQRAMERPFQLLDQYLELSQRFDEQVARNIRQYLGSGDAVRQQAALQALESLAEAL
CtpH-LBD  -----

          70      80      90      100     110     120
CtpL-LBD  PELPPDLARTLAPSLAELREFSAGDLLAAGKLAGDPQGLLLQAERDLTGNLEQWSAYLDA
CtpH-LBD  -----SLTGDVFRAYRELLGGPVRAA-----QLIDEANLQFRGQVQEWKNVLLR

          130     140     150     160     170     180
CtpL-LBD  AAGQPQAGAYRTPLLLASLHLTRLSLARAKLVESANPALAGDVERELANLREQAGRIEAL
CtpH-LBD  GRQTEAQTKYWS-----QFEAQERAVQDILGRLGSVAEGELKDRVERLREEHRRLGTA

          190     200     210     220     230     240
CtpL-LBD  PLLGVLDEQRSASDDFAAMMGLAGDAEAGAGNAEDRGVALRRELASLLQRYPDELRRTRD
CtpH-LBD  YRQGRQRFLERAGADPIAGDQAVTG-----IDRATTAQMQLRDELHQASD

          250     260     270     280
CtpL-LBD  LIERRQQLSADTGARLDAVRQALATLEPQVRGERQRLQGQVRLIQG
CtpH-LBD  LHS--SSISAEARRTM-----

```

**Fig. S3) Sequence alignment of the ligand binding domains of the CtpH and CtpL receptors.** Alignment was carried out using default parameters in CLUSTALW from the Network Protein Sequence Analysis suite ([http://npsa-pbil.ibcp.fr/cgi-bin/npsa\\_automat.pl?page=/NPSA/npsa\\_clustalw.html](http://npsa-pbil.ibcp.fr/cgi-bin/npsa_automat.pl?page=/NPSA/npsa_clustalw.html)).

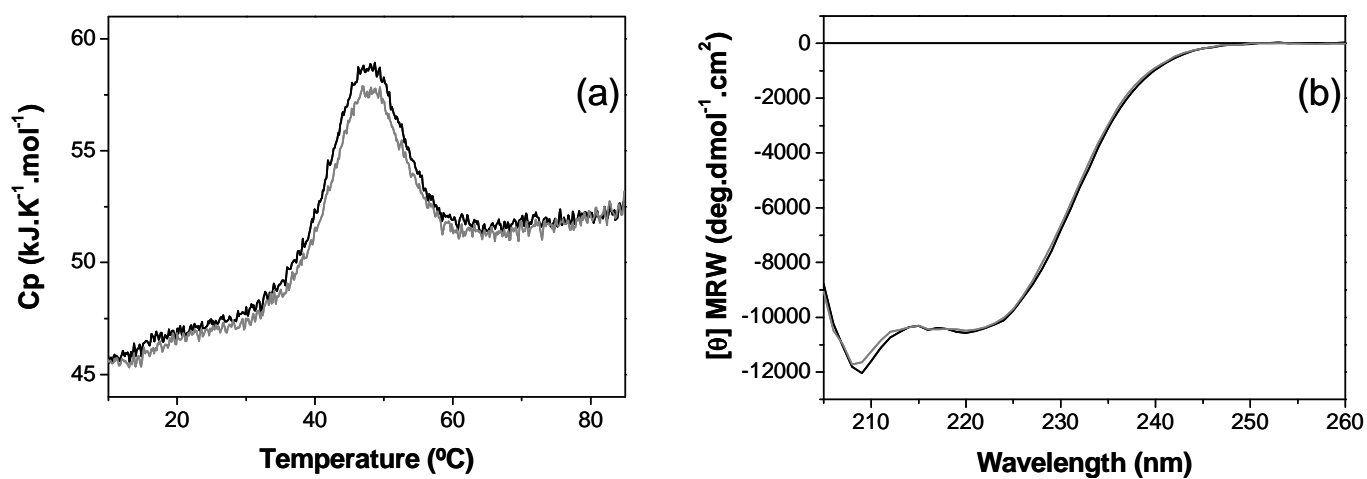

**Fig. S4) Reversibility of the CtpH-LBD unfolding process.** (a) DSC thermogram of CtpH-LBD (black line) and second consecutive up-scan of the same sample (grey line). (b) Far UV CD spectra of CtpH-LBD before (black line) and after heat treatment at 85 $^{\circ}\text{C}$  for 5 minutes (grey line).

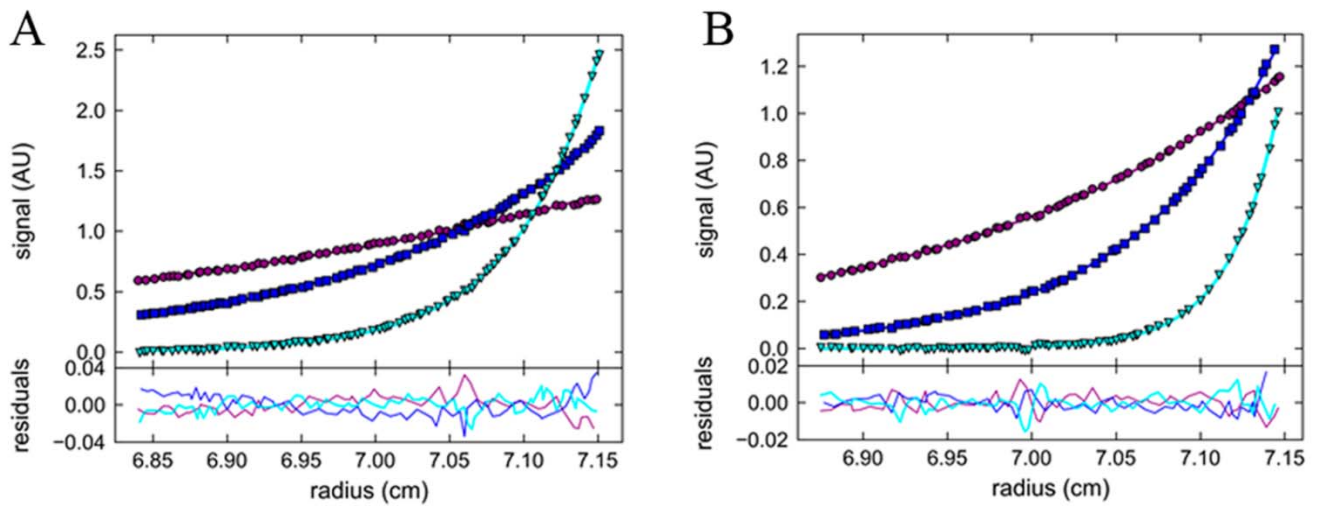

**Fig. S5) Sedimentation equilibrium analytical ultracentrifugation analysis of CtpH-LBD.** Gradients recorded using absorbance at 280 nm for 45  $\mu$ M CtpH-LBD in the absence (A) or in the presence (B) of 0.5 mM Pi. Measurements were made at 6  $^{\circ}$ C and at velocities of 11800 rpm (cyan), 18100 rpm (blue) and 31000 rpm (purple). The lines represent best fits obtained with the SEDPHAT single species of interacting system model. The residuals for the fits are shown in the lower panel.

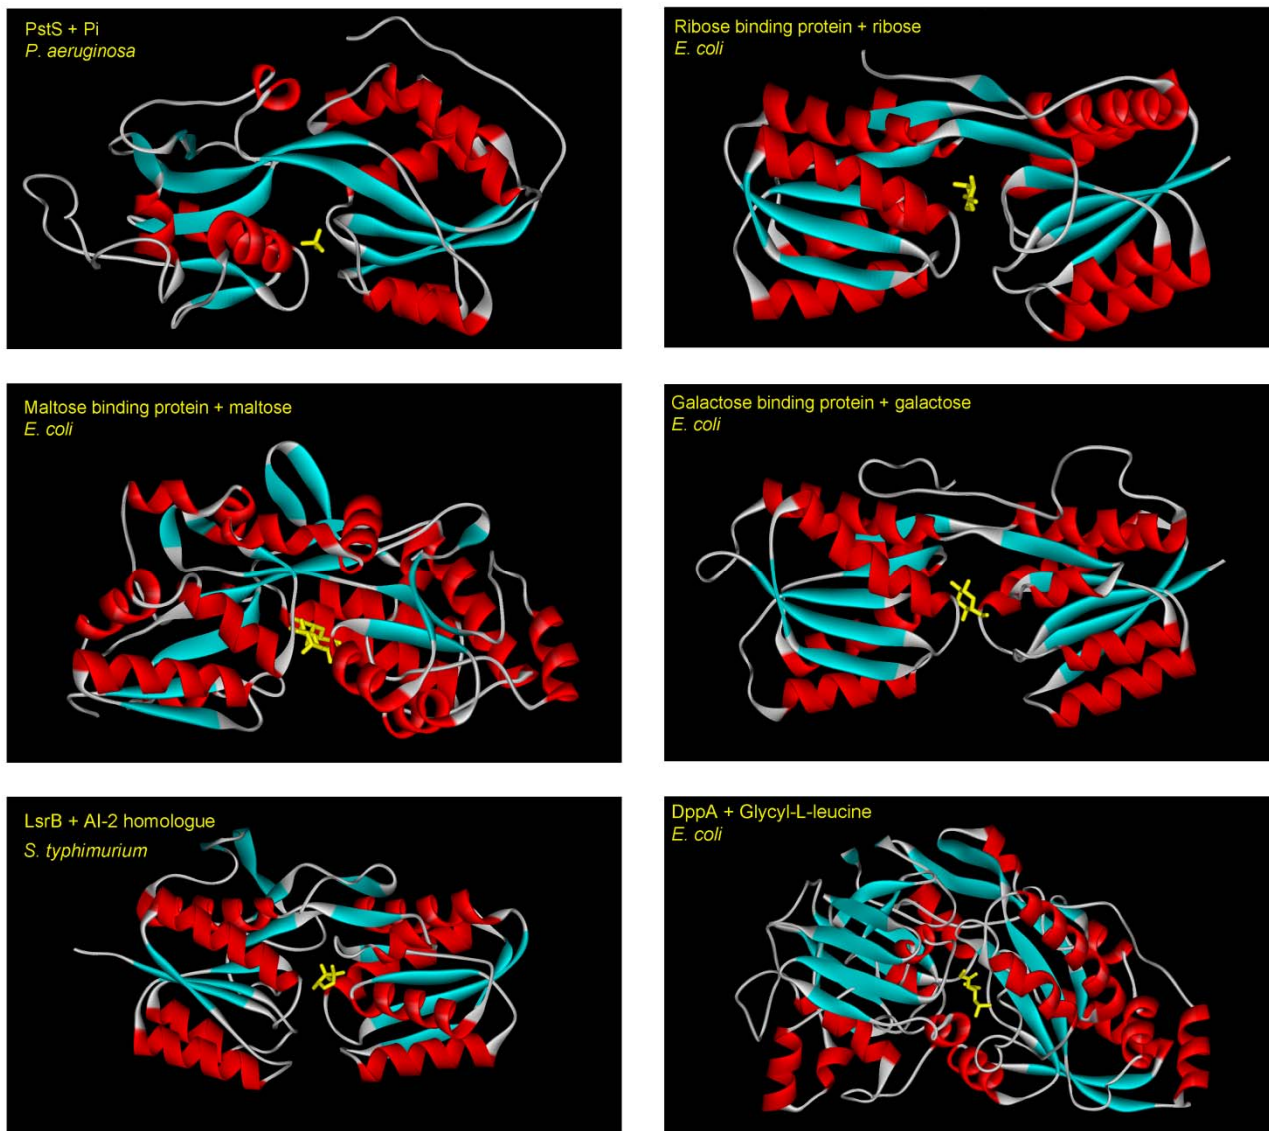

**Fig. S6) Structures of periplasmic ligand binding proteins in complex with their cognate ligands (in yellow).** PstS of *P. aeruginosa* in complex with Pi <sup>3</sup>(pdb ID: 4OMB), Ribose Binding Protein (pdb ID: 2GX6), Galactose Binding Protein (pdb ID: 2GBP) <sup>4</sup>, Maltose Binding Protein (pdb ID: 2MV0) <sup>5</sup>, Dipeptide binding protein DppA (pdb ID: 1DPP) <sup>6</sup> and the LsrB protein in complex with an AI-2 homologue (pdb ID: 1TJY) <sup>7</sup>.

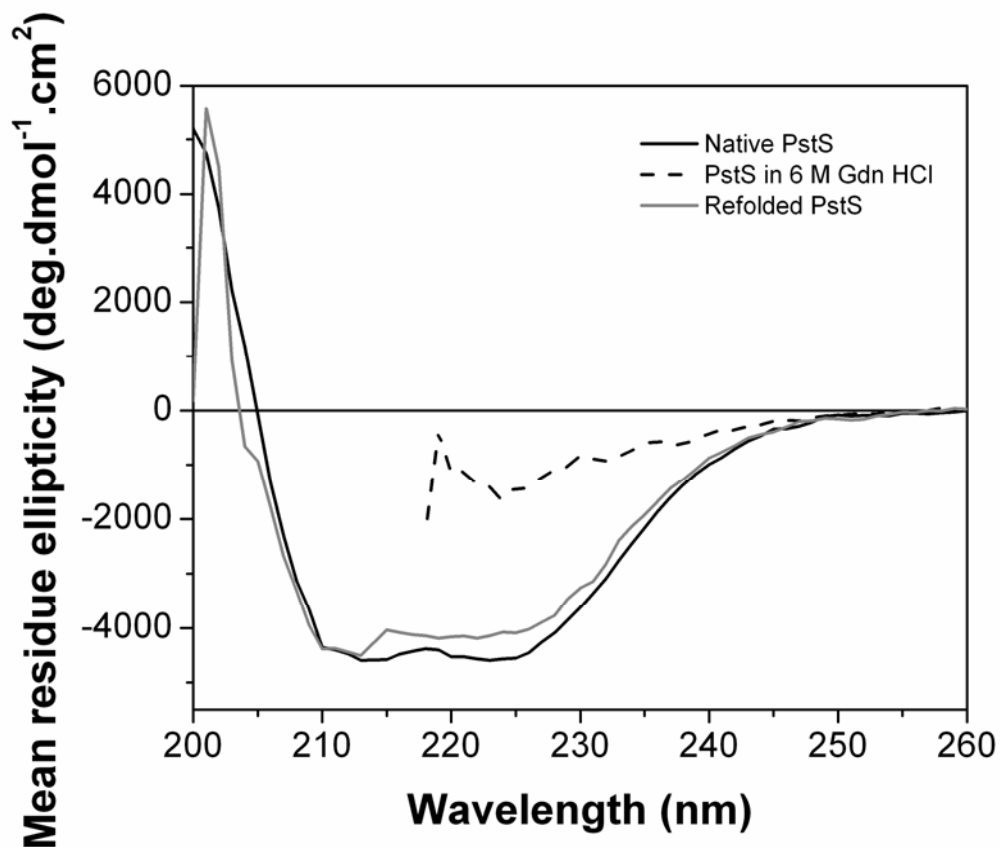

**Fig. S7) Far UV circular dichroism spectra of PstS obtained after affinity purification (native PstS), unfolded protein (PstS in 6M GdnHCl) and after refolding (refolded PstS).** Proteins were at a concentration of 10  $\mu$ M in 10 mM Tris/HCl, pH 8.0 (native and refolded PstS) or in 10 mM Tris/HCl, pH 8.0, containing 6 M guanidine hydrochloride. The derived percentages of secondary structure elements are shown in Table S1.



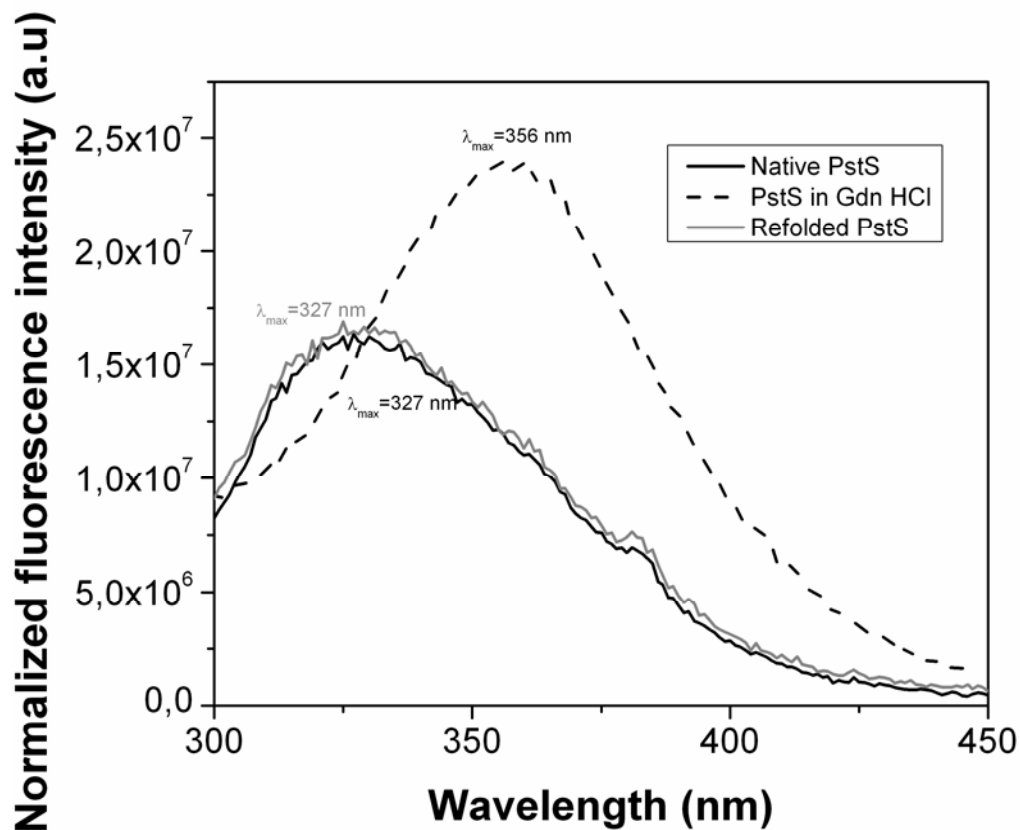

**Fig. S8) Intrinsic fluorescence emission spectra of native PstS, unfolded protein (in 6 M guanidine hydrochloride) and after refolding.** The wavelengths of the maximum fluorescence intensity are indicated. Proteins were at a concentration of 10  $\mu$ M in 10 mM Tris/HCl, pH 8.0 (native and refolded PstS) or in 10 mM Tris/HCl, pH 8.0, containing 6 M guanidine hydrochloride.

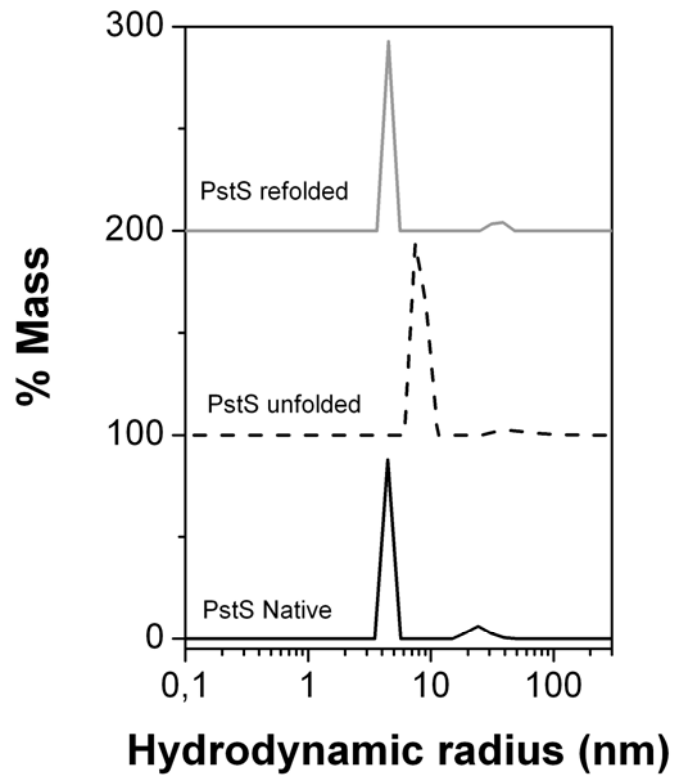

**Fig. S9) Dynamic light scattering measurements of PstS in its native, unfolded (in guanidine hydrochloride) and refolded forms.** For clarity traces have been moved arbitrarily on the y-axis. The following hydrodynamic radii were determined: *refolded PstS*:  $R_h=4.5$  nm (92.7 %) and 35.3 nm (7.3 %); *unfolded PstS*:  $R_h=8.2$  nm (94.1 %) and 54.6 nm (5.9 %); *native PstS*:  $R_h=4.4$  nm (88.1 %) and 25.1 nm (11.9 %).

**Table S1 : Secondary structure contents of native, unfolded and refolded PstS as determined by the deconvolution of the far UV CD dichroism spectra shown in Fig. S7.** Spectra were deconvoluted using the CDNN program <sup>8</sup> and the errors were obtained using the deconvolution results obtained in the 260-205 nm range and those in the 260-210 nm range.

|                       | <b>Native PstS (%)</b> | <b>Unfolded PstS*</b> | <b>Refolded PstS (%)</b> |
|-----------------------|------------------------|-----------------------|--------------------------|
| $\alpha$ -helix       | 19.1 $\pm$ 1.4         | n.a.                  | 18.4 $\pm$ 1.0           |
| $\beta$ -antiparallel | 10.3 $\pm$ 0.6         | n.a.                  | 10.9 $\pm$ 0.9           |
| $\beta$ -parallel     | 10.8 $\pm$ 0.7         | n.a.                  | 11.0 $\pm$ 0.7           |
| $\beta$ -turn         | 12.7 $\pm$ 0.1         | n.a.                  | 12.4 $\pm$ 0.1           |
| random coil           | 47.1 $\pm$ 1.0         | n.a.                  | 47.3 $\pm$ 1.0           |

\*Not analysed. Data could not be deconvoluted due to reduced wavelength range.

**Table S2) Strains and Plasmids used in this study.**

| Bacterial strains                    | Relevant characteristics <sup>a</sup>                                                                                                                                                    | Reference  |
|--------------------------------------|------------------------------------------------------------------------------------------------------------------------------------------------------------------------------------------|------------|
| <b><i>Escherichia coli</i></b>       |                                                                                                                                                                                          |            |
| DH5 $\alpha$                         | <i>supE44 lacU169 (Ø80lacZΔ M15) hsdR17 (r<sub>k</sub><sup>-</sup>m<sub>k</sub><sup>-</sup>) recA1 endA1 gyrA96 thi-1 relA1</i>                                                          | 9          |
| BL21 (DE3)                           | F <sup>-</sup> <i>ompI hsdS<sub>B</sub> (r<sub>B</sub><sup>-</sup> m<sub>B</sub><sup>-</sup>)</i>                                                                                        | 10         |
| HB101                                | F <sup>-</sup> <i>mcrB mrr hsdS20(r<sub>B</sub><sup>-</sup> m<sub>B</sub><sup>-</sup>) recA13 leuB6 ara-14 proA2 lacY1 galK2 xyl-5 mtl-1 rpsL20(Sm<sup>R</sup>) glnV44 λ<sup>-</sup></i> | 11,12      |
| CC118λ <i>pir</i>                    | Rif <sup>R</sup> ; Δ( <i>ara-leu</i> ) <i>araD ΔlacX74 galE galK phoA20 thi-1 rpsE rpoB argE(Am) recA1 Tn7 λpir</i>                                                                      | 13         |
| <b><i>Pseudomonas aeruginosa</i></b> |                                                                                                                                                                                          |            |
| PAO1                                 | Wild type                                                                                                                                                                                | 14         |
| <i>ctpH</i>                          | PAO1, <i>ctpH::Km</i> ; Km <sup>R</sup>                                                                                                                                                  | 15         |
| <i>pstS</i>                          | PAO1 in-frame Δ <i>pstS</i>                                                                                                                                                              | This study |
| <i>ctpHpstS</i>                      | PAO1 in-frame Δ <i>pstS</i> , <i>ctpH::Km</i> ; Km <sup>R</sup>                                                                                                                          | This study |
| <b>Plasmids</b>                      |                                                                                                                                                                                          |            |
| pET28b(+)                            | Km <sup>R</sup> ; protein expression vector                                                                                                                                              | Novagen    |
| pET28b-CtpH-LBD                      | Km <sup>R</sup> ; pET28b(+) derivative encoding CtpH-LBD (amino acids 60-214)                                                                                                            | This work  |
| pET28b-CtpL-LBD                      | Km <sup>R</sup> ; pET28b(+) derivative encoding CtpL-LBD (amino acids 27-324)                                                                                                            | This work  |
| pET28b-PstS-LBD                      | Km <sup>R</sup> ; pET28b(+) derivative with <i>pstS</i> gene                                                                                                                             | This work  |
| pRK600                               | Cm <sup>R</sup> ; <i>mob tra</i>                                                                                                                                                         | 12         |
| pUC18NotI                            | Ap <sup>R</sup> ; <i>ori</i> pMB1, pUC18 derivative but with NotI sites flanking the MCS; cloning vector                                                                                 | Biomedal   |
| pUC18NotI-Up                         | Ap <sup>R</sup> ; pUC18NotI derivative containing a 0.35-kb HindIII-XbaI fragment of the upstream region of <i>pstS</i>                                                                  | This study |
| pUC18NotI-Dw                         | Ap <sup>R</sup> ; pUC18NotI derivative containing a 0.35-kb EcoRI-XbaI fragment of the downstream region of <i>pstS</i>                                                                  |            |
| pUC18NotI-5369UpDw                   | Ap <sup>R</sup> ; a 0.7-kb HindIII-EcoRI fragment containing fused up- and downstream regions of <i>pstS</i> cloned in pUC18NotI                                                         | This study |
| pKNG101                              | Sm <sup>R</sup> ; <i>oriR6K mob sacBR</i> ; suicide vector                                                                                                                               | 16         |
| pKNG101-UpDw                         | Sm <sup>R</sup> ; pKNG101 derivative containing a 0.7-Kb NotI fragment from pUC18NotI-5369UpDw cloned into pKNG101                                                                       | This study |
| pRK600                               | Cm <sup>R</sup> ; <i>oriColE1 RK2 mob<sup>+</sup> tra<sup>+</sup></i> ; helper plasmid                                                                                                   | 17         |
| pBBR1MCS-5                           | Gm <sup>R</sup> ; <i>oriRK2 mob<sup>+</sup></i>                                                                                                                                          | 18         |
| pBBR1MCS-5-pstS                      | Gm <sup>R</sup> ; pBBR1MCS-5 derivative containing <i>pstS</i>                                                                                                                           | This study |

<sup>a</sup>Cm, chloramphenicol; Ap, ampicillin; Sm, streptomycin; Km, kanamycin; Gm, gentamycin; Rif, rifampicin

**Table S3) Oligonucleotides used in this study.** Restriction sites are underlined.

| <b>Name</b>         | <b>Sequence</b>                                   | <b>Purpose</b>                   |
|---------------------|---------------------------------------------------|----------------------------------|
| CtpH-LBD-f          | 5'-AAC <u>CATATG</u> ATGTCGCTGACCGGCGACGTACGCG-3' | Construction of pET28b-CtpH-LBD  |
| CtpH-LBD-r          | 5'-AAG <u>GATCCT</u> CAGGTGCGCCGGCCTCCGCGCTG-3'   | Construction of pET28b-CtpH-LBD  |
| CtpL-LBD-f          | 5'-AAC <u>CATATG</u> ATGTCGCAACGCGCCATGGAGCGGC-3' | Construction of pET28b-CtpL-LBD  |
| CtpL-LBD-r          | 5'-AAG <u>GATCCT</u> CACTGGATCAGGCGTACCTGGCCT-3'  | Construction of pET28b-CtpL-LBD  |
| PstS-f              | 5'-AAC <u>CATATG</u> AAACTCAAGCGTTTGATGG-3'       | Construction of pET28b-PstS-LBD  |
| PstS-r              | 5'-AAG <u>AATTCT</u> TACAGGCCCAGTTCCTTG-3'        | Construction of pET28b-PstS-LBD  |
| PA5369 Upf          | 5'-AAA <u>AGCTT</u> GTCAGCGATGACCGGG-3'           | Construction of pUC18NotI-5369Up |
| PA5369 Upr          | 5'-AAT <u>CTAGAG</u> CCAGTATCGTCAGGCCG-3'         | Construction of pUC18NotI-5369Up |
| PA5369 Dwf          | 5'-AAT <u>CTAGAT</u> CCAGTGACTTGAGCGGAT-3'        | Construction of pUC18NotI-5369Dw |
| PA5369 Dwr          | 5'-AAG <u>AATTCT</u> TAGGCCAGGTAGAAGAAGATCA-3'    | Construction of pUC18NotI-5369Dw |
| pstS-<br>pBBRMCS5-f | 5'-AGA <u>ATCGCA</u> TATGAAACTCAAGCGTTTGATGGC-3'  | Construction of pBBR1MCS-5-pstS  |
| pstS-<br>pBBRMCS5-r | 5'-AAG <u>AATTCT</u> TACAGGCCCAGTTCCTTGATCGC-3'   | Construction of pBBR1MCS-5-pstS  |

## References

- 1 Cserzo, M., Wallin, E., Simon, I., von Heijne, G. & Elofsson, A. Prediction of transmembrane alpha-helices in prokaryotic membrane proteins: the dense alignment surface method. *Protein Eng.* **10**, 673-676 (1997).
- 2 Deleage, G., Blanchet, C. & Geourjon, C. Protein structure prediction. Implications for the biologist. *Biochimie* **79**, 681-686 (1997).
- 3 Neznansky, A., Blus-Kadosh, I., Yerushalmi, G., Banin, E. & Opatowsky, Y. The *Pseudomonas aeruginosa* phosphate transport protein PstS plays a phosphate-independent role in biofilm formation. *FASEB J.* **28**, 5223-5233 (2014).
- 4 Vyas, N. K., Vyas, M. N. & Quioco, F. A. Sugar and signal-transducer binding sites of the *Escherichia coli* galactose chemoreceptor protein. *Science* **242**, 1290-1295 (1988).
- 5 Shilton, B. H., Shuman, H. A. & Mowbray, S. L. Crystal structures and solution conformations of a dominant-negative mutant of *Escherichia coli* maltose-binding protein. *J. Mol. Biol.* **264**, 364-376 (1996).
- 6 Dunten, P. & Mowbray, S. L. Crystal structure of the dipeptide binding protein from *Escherichia coli* involved in active transport and chemotaxis. *Protein Sci.* **4**, 2327-2334 (1995).
- 7 Miller, S. T. *et al.* *Salmonella typhimurium* recognizes a chemically distinct form of the bacterial quorum-sensing signal AI-2. *Mol. Cell* **15**, 677-687 (2004).
- 8 Bohm, G., Muhr, R. & Jaenicke, R. Quantitative analysis of protein far UV circular dichroism spectra by neural networks. *Protein Eng.* **5**, 191-195 (1992).
- 9 Woodcock, D. M. *et al.* Quantitative evaluation of *Escherichia coli* host strains for tolerance to cytosine methylation in plasmid and phage recombinants. *Nucleic Acids Res.* **17**, 3469-3478 (1989).
- 10 Studier, F. W. & Moffatt, B. A. Use of bacteriophage T7 RNA polymerase to direct selective high-level expression of cloned genes. *J. Mol. Biol.* **189**, 113-130 (1986).
- 11 Boyer, H. W. & Roulland-Dussoix, D. A complementation analysis of the restriction and modification of DNA in *Escherichia coli*. *J. Mol. Biol.* **41**, 459-472 (1969).
- 12 Kessler, B., de Lorenzo, V. & Timmis, K. N. A general system to integrate *lacZ* fusions into the chromosomes of gram-negative eubacteria: regulation of the  $P_m$  promoter of the TOL plasmid studied with all controlling elements in monocopy. *Mol. Gen. Genet.* **233**, 293-301 (1992).

- 13 Herrero, M., de Lorenzo, V. & Timmis, K. N. Transposon vectors containing non-antibiotic resistance selection markers for cloning and stable chromosomal insertion of foreign genes in gram-negative bacteria. *J. Bacteriol.* **172**, 6557-6567 (1990).
- 14 Stover, C. K. *et al.* Complete genome sequence of *Pseudomonas aeruginosa* PAO1, an opportunistic pathogen. *Nature* **406**, 959-964 (2000).
- 15 Wu, H. *et al.* Identification and characterization of two chemotactic transducers for inorganic phosphate in *Pseudomonas aeruginosa*. *J Bacteriol* **182**, 3400-3404 (2000).
- 16 Kaniga, K., Delor, I. & Cornelis, G. R. A wide-host-range suicide vector for improving reverse genetics in gram-negative bacteria: inactivation of the *blaA* gene of *Yersinia enterocolitica*. *Gene* **109**, 137-141 (1991).
- 17 de Lorenzo, V., Herrero, M., Jakubzik, U. & Timmis, K. N. Mini-Tn5 transposon derivatives for insertion mutagenesis, promoter probing, and chromosomal insertion of cloned DNA in gram-negative eubacteria. *J. Bacteriol.* **172**, 6568-6572 (1990).
- 18 Kovach, M. E. *et al.* Four new derivatives of the broad-host-range cloning vector pBBR1MCS, carrying different antibiotic-resistance cassettes. *Gene* **166**, 175-176 (1995).
